# Supplementary material
Source: PubMed Central journal article supplement (PMC2268777)

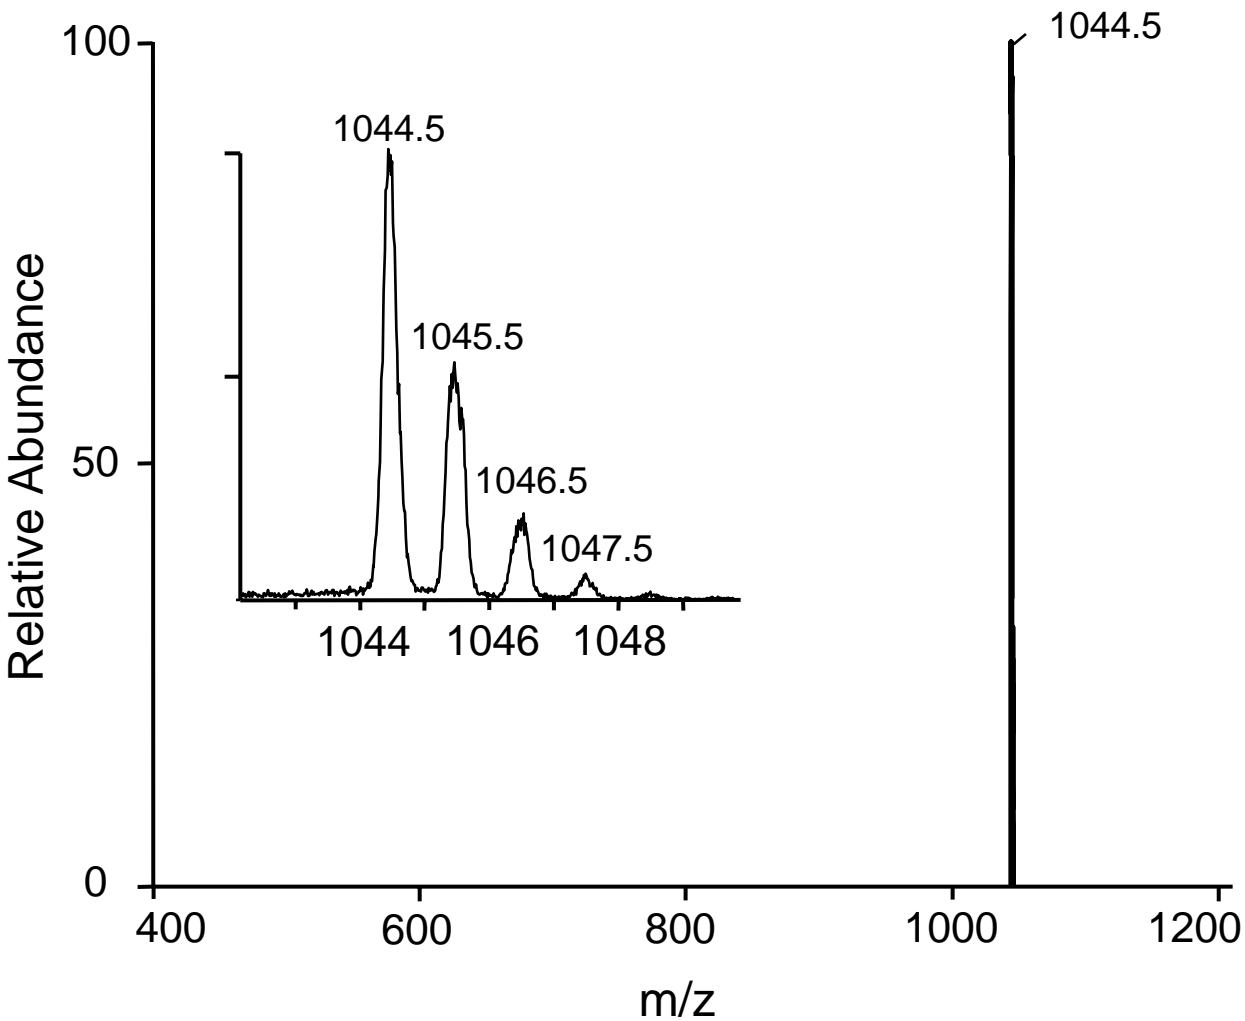

Supplement: pnas_0711504105_1.pdf [file pnas_0711504105_1.pdf]

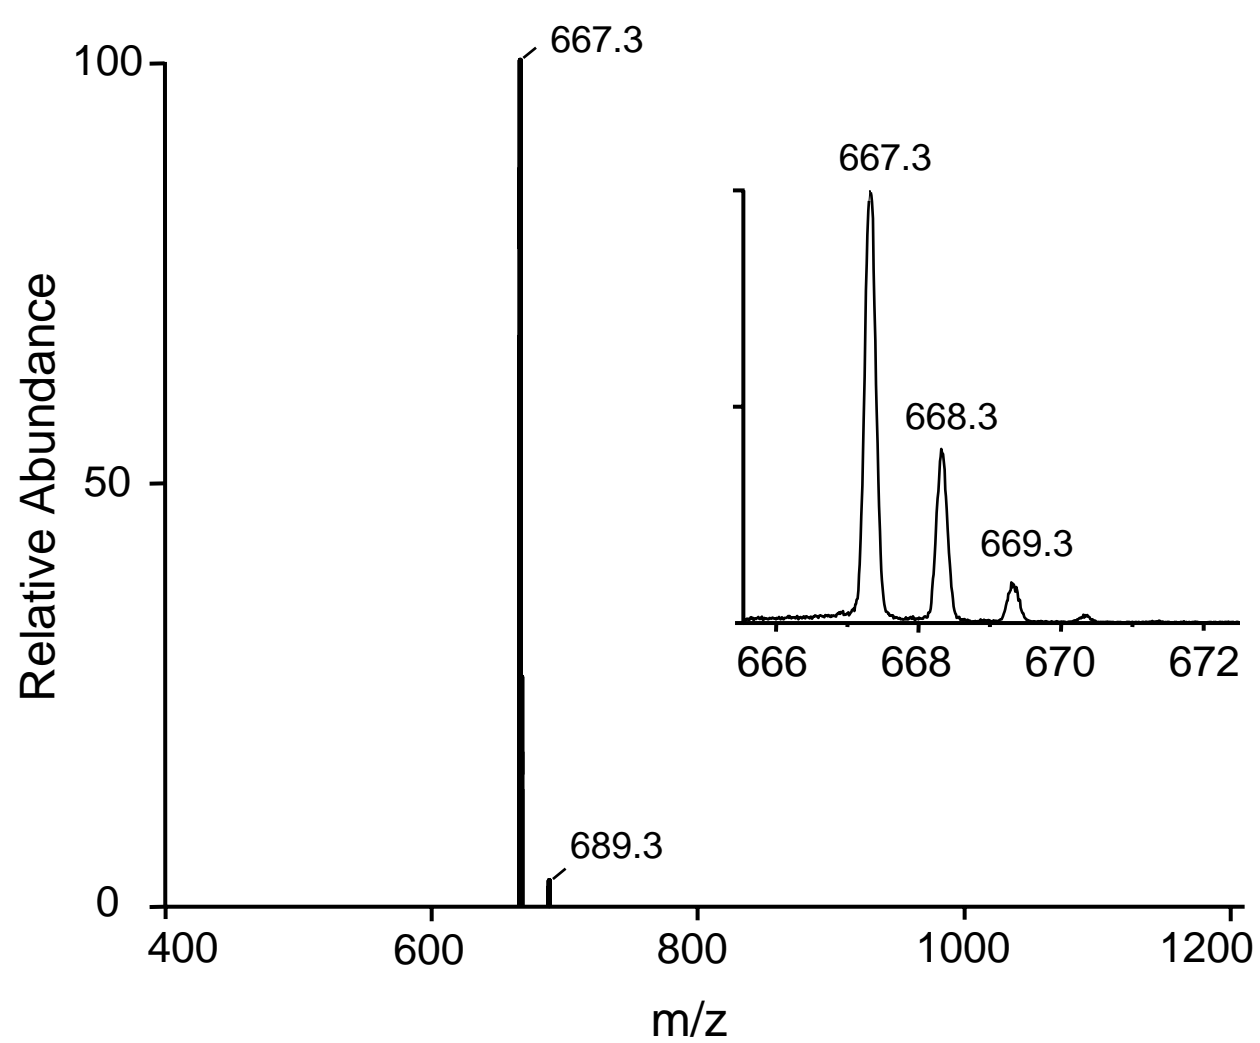

Supplement: pnas_0711504105_2.pdf [file pnas_0711504105_2.pdf]

Total Ion Count

● m/z 1044.5

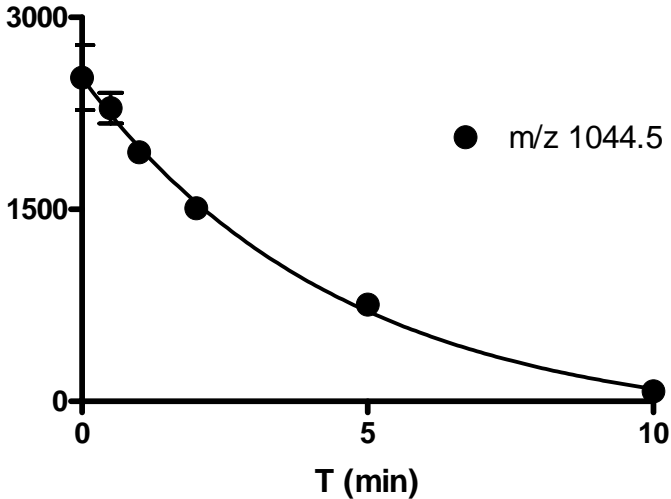

Supplement: pnas_0711504105_3.pdf [file pnas_0711504105_3.pdf]

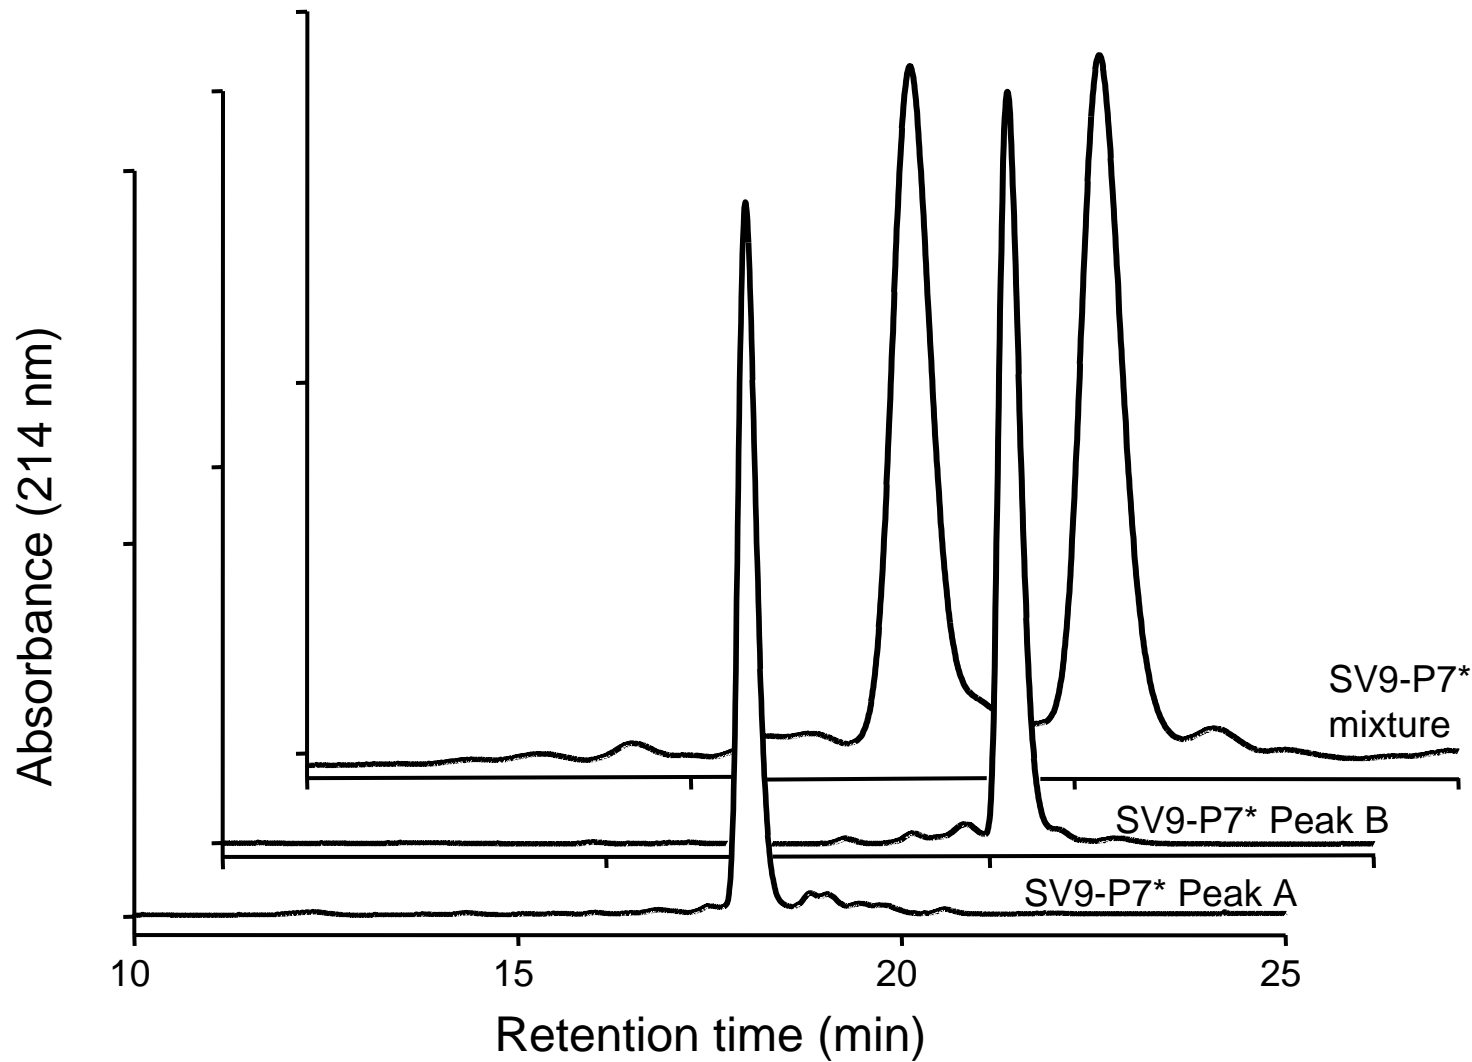

Supplement: pnas_0711504105_4.pdf [file pnas_0711504105_4.pdf]

**S150**

**ANP**

**G'16**

**E'18**

**K146**

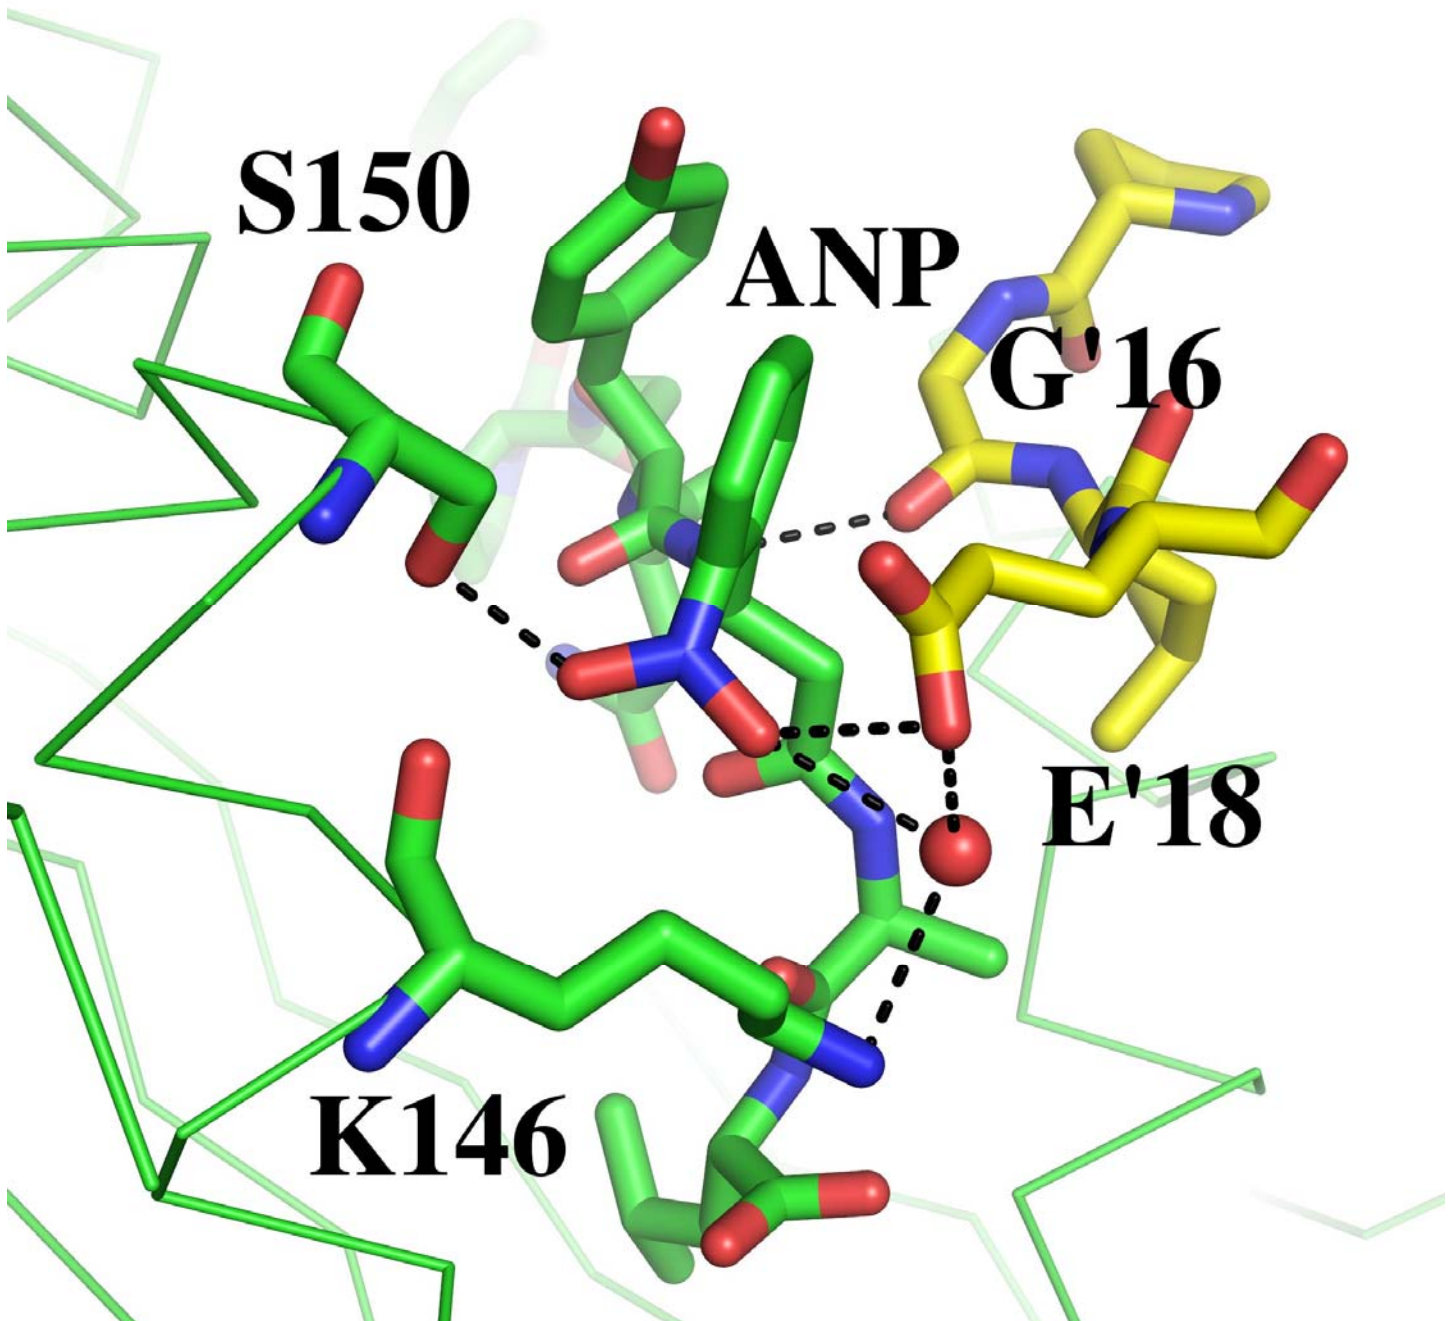

Supplement: pnas_0711504105_5.pdf [file pnas_0711504105_5.pdf]

**a**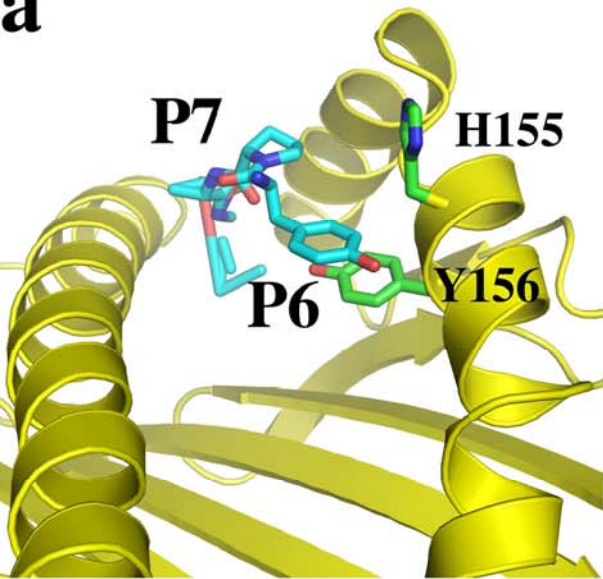**b**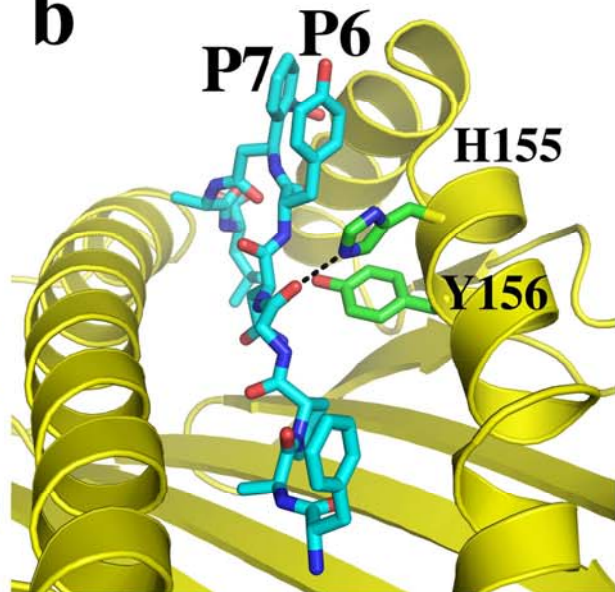**c**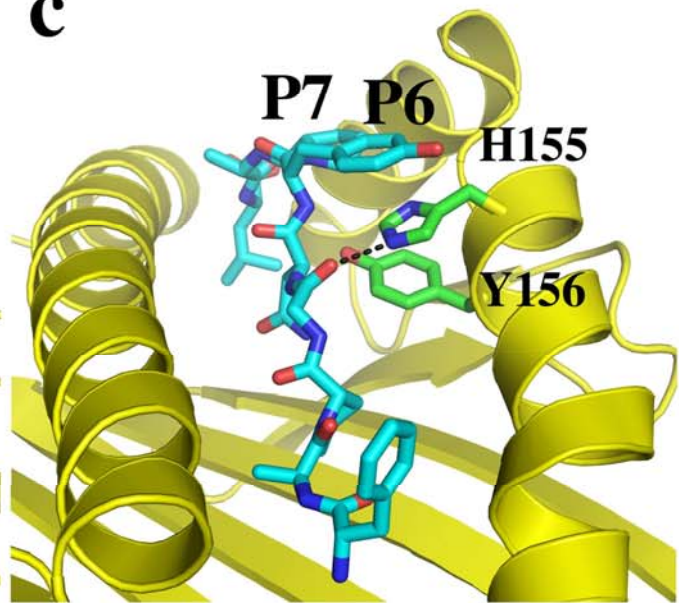

Supplement: pnas_0711504105_6.pdf [file pnas_0711504105_6.pdf]

**ANP**

**P6\_Tyr**

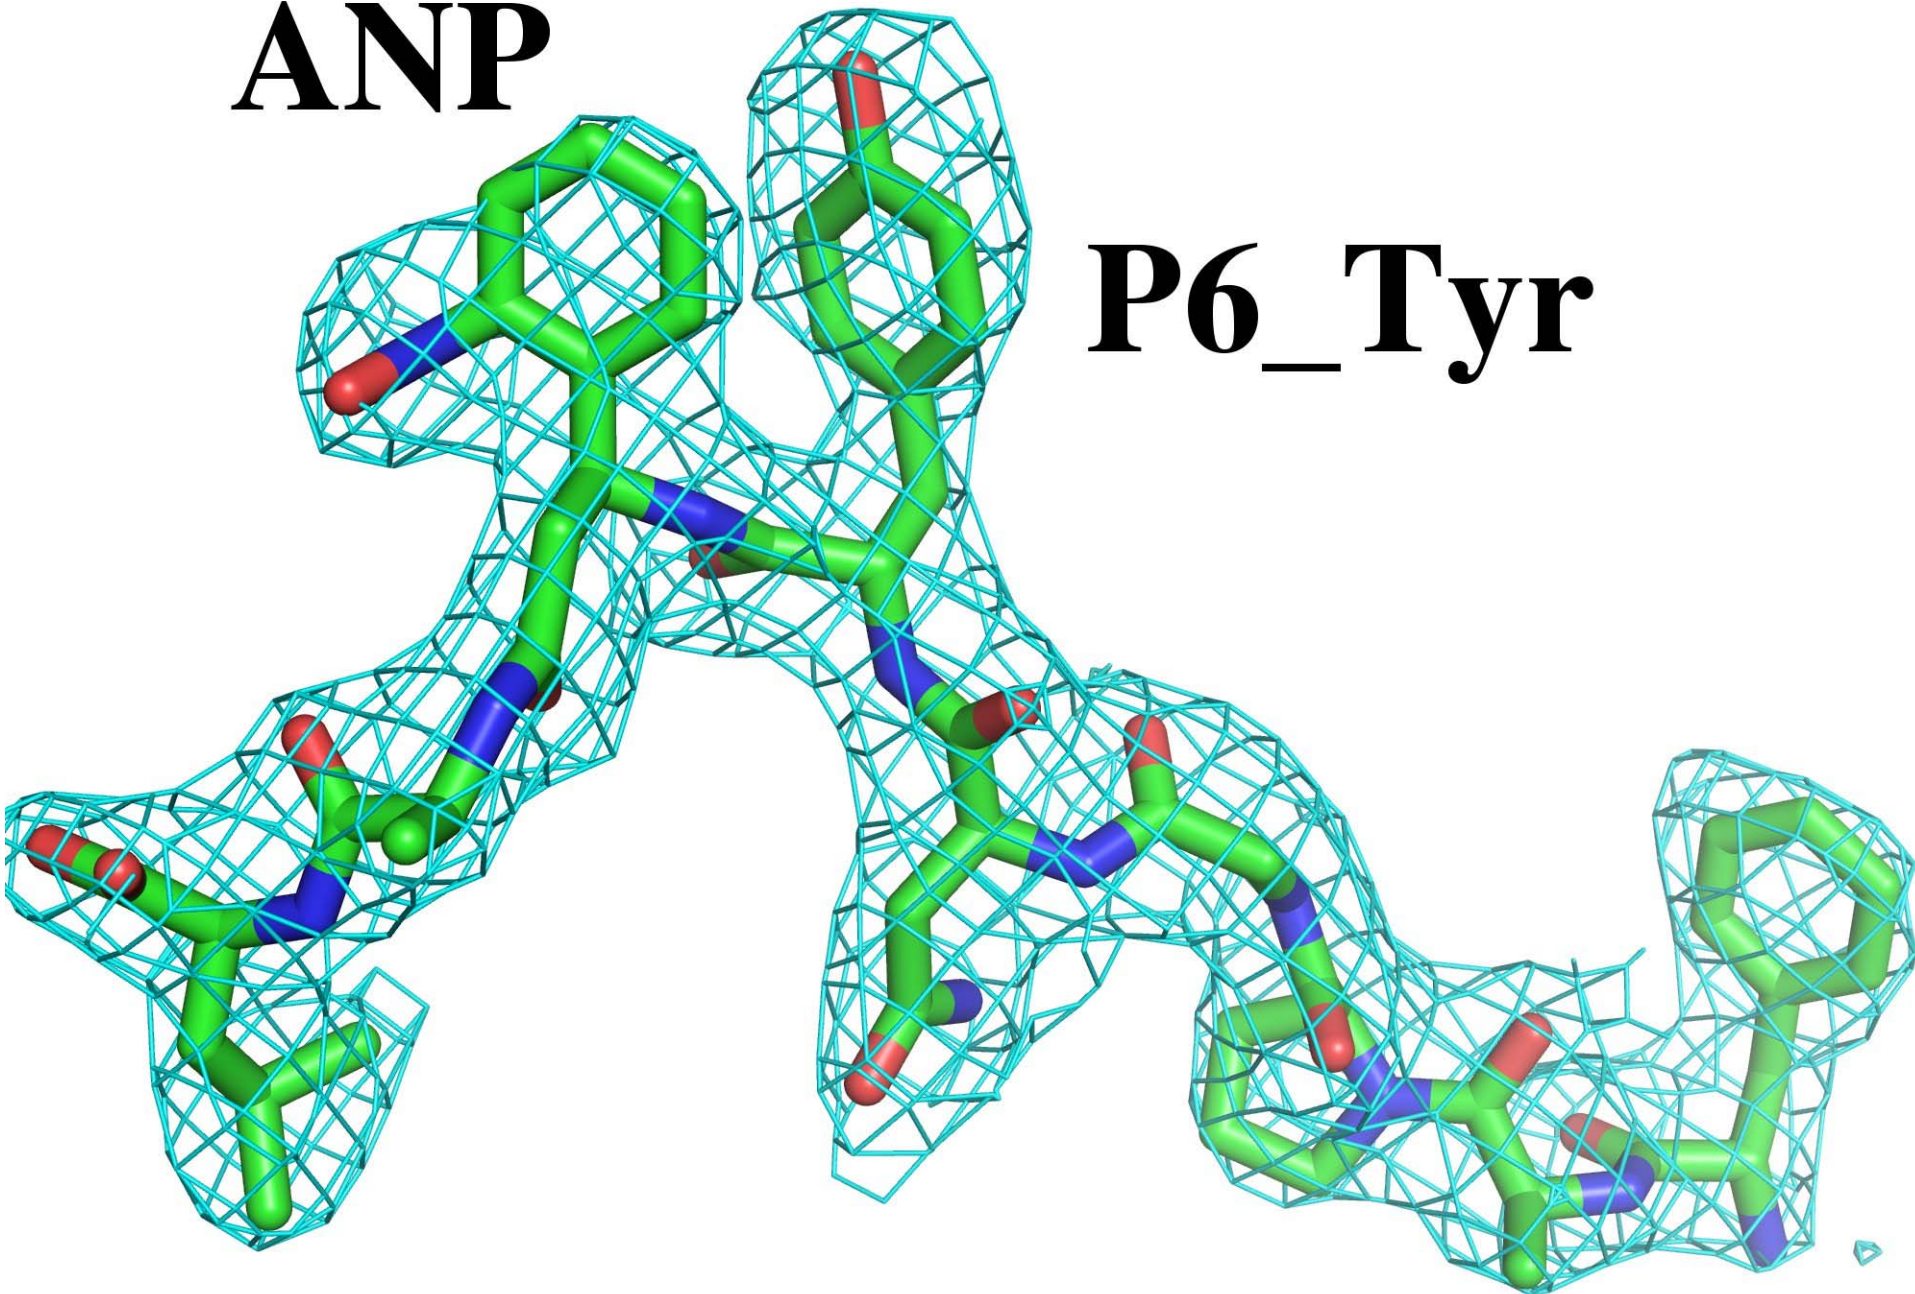

Supplement: pnas_0711504105_7.pdf [file pnas_0711504105_7.pdf]

Relative Abundance

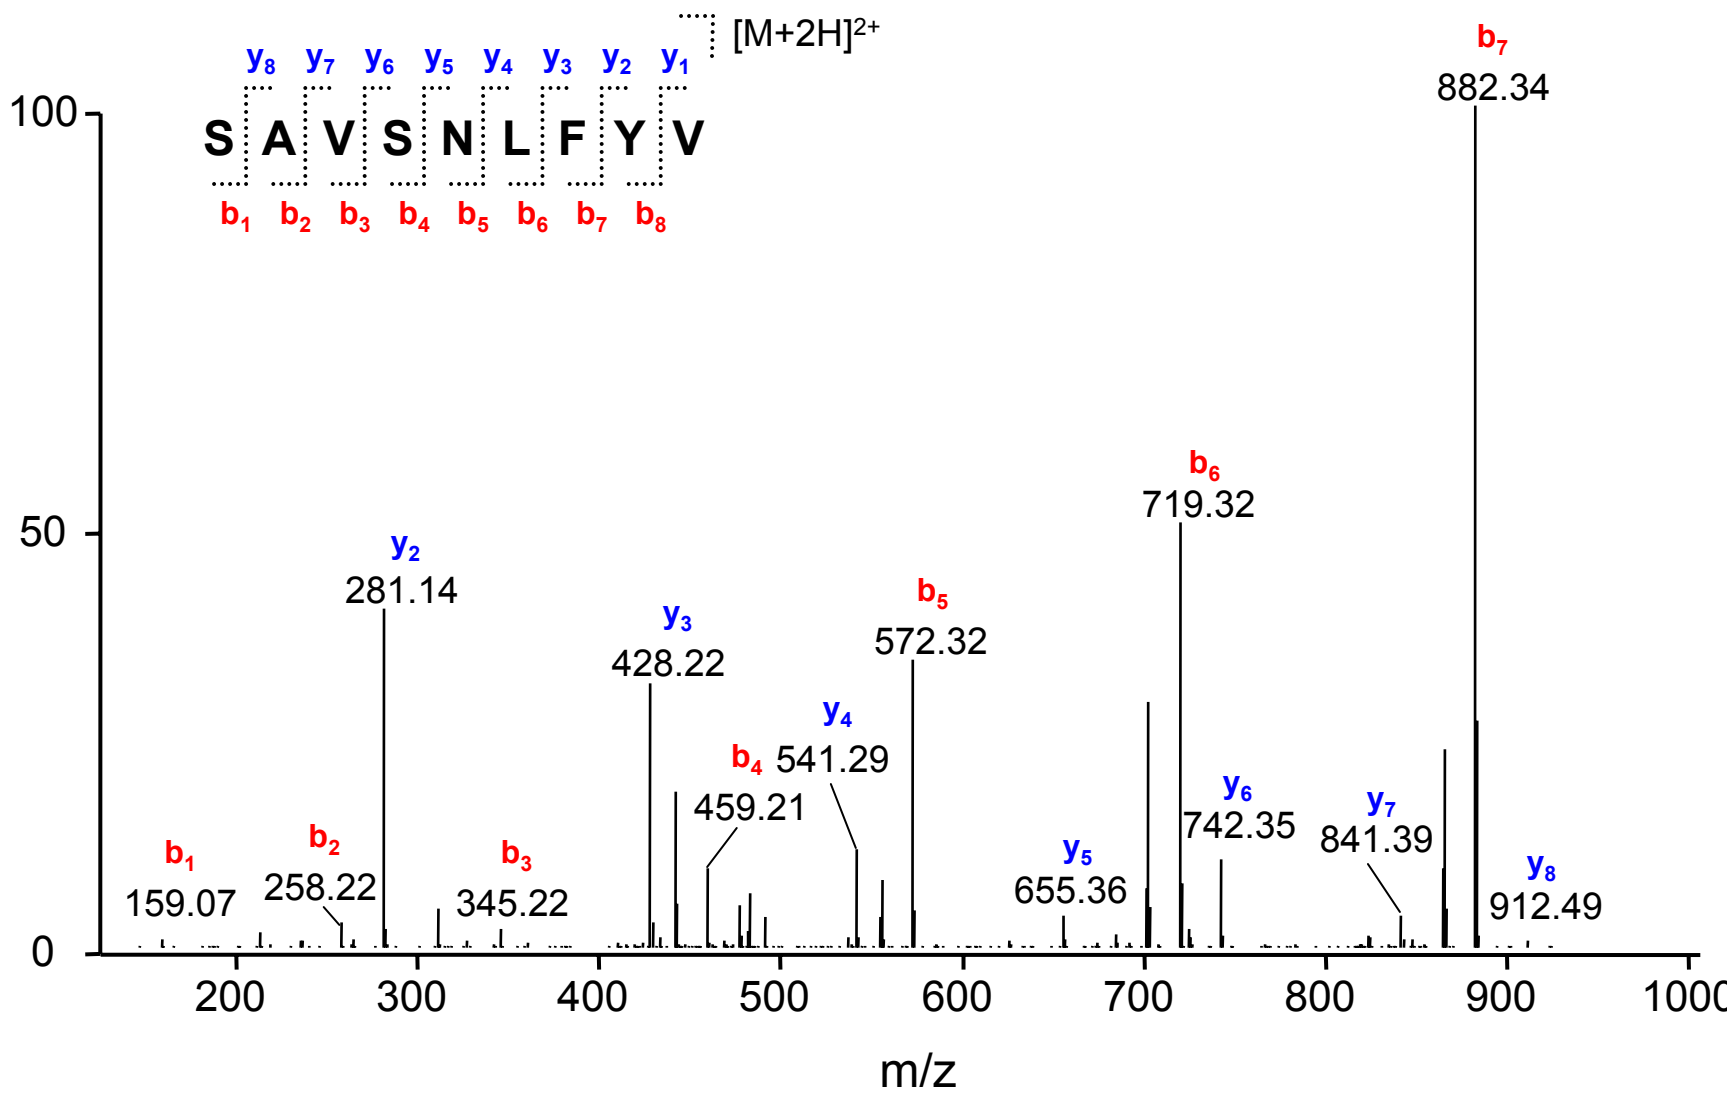

Supplement: pnas_0711504105_8.pdf [file pnas_0711504105_8.pdf]

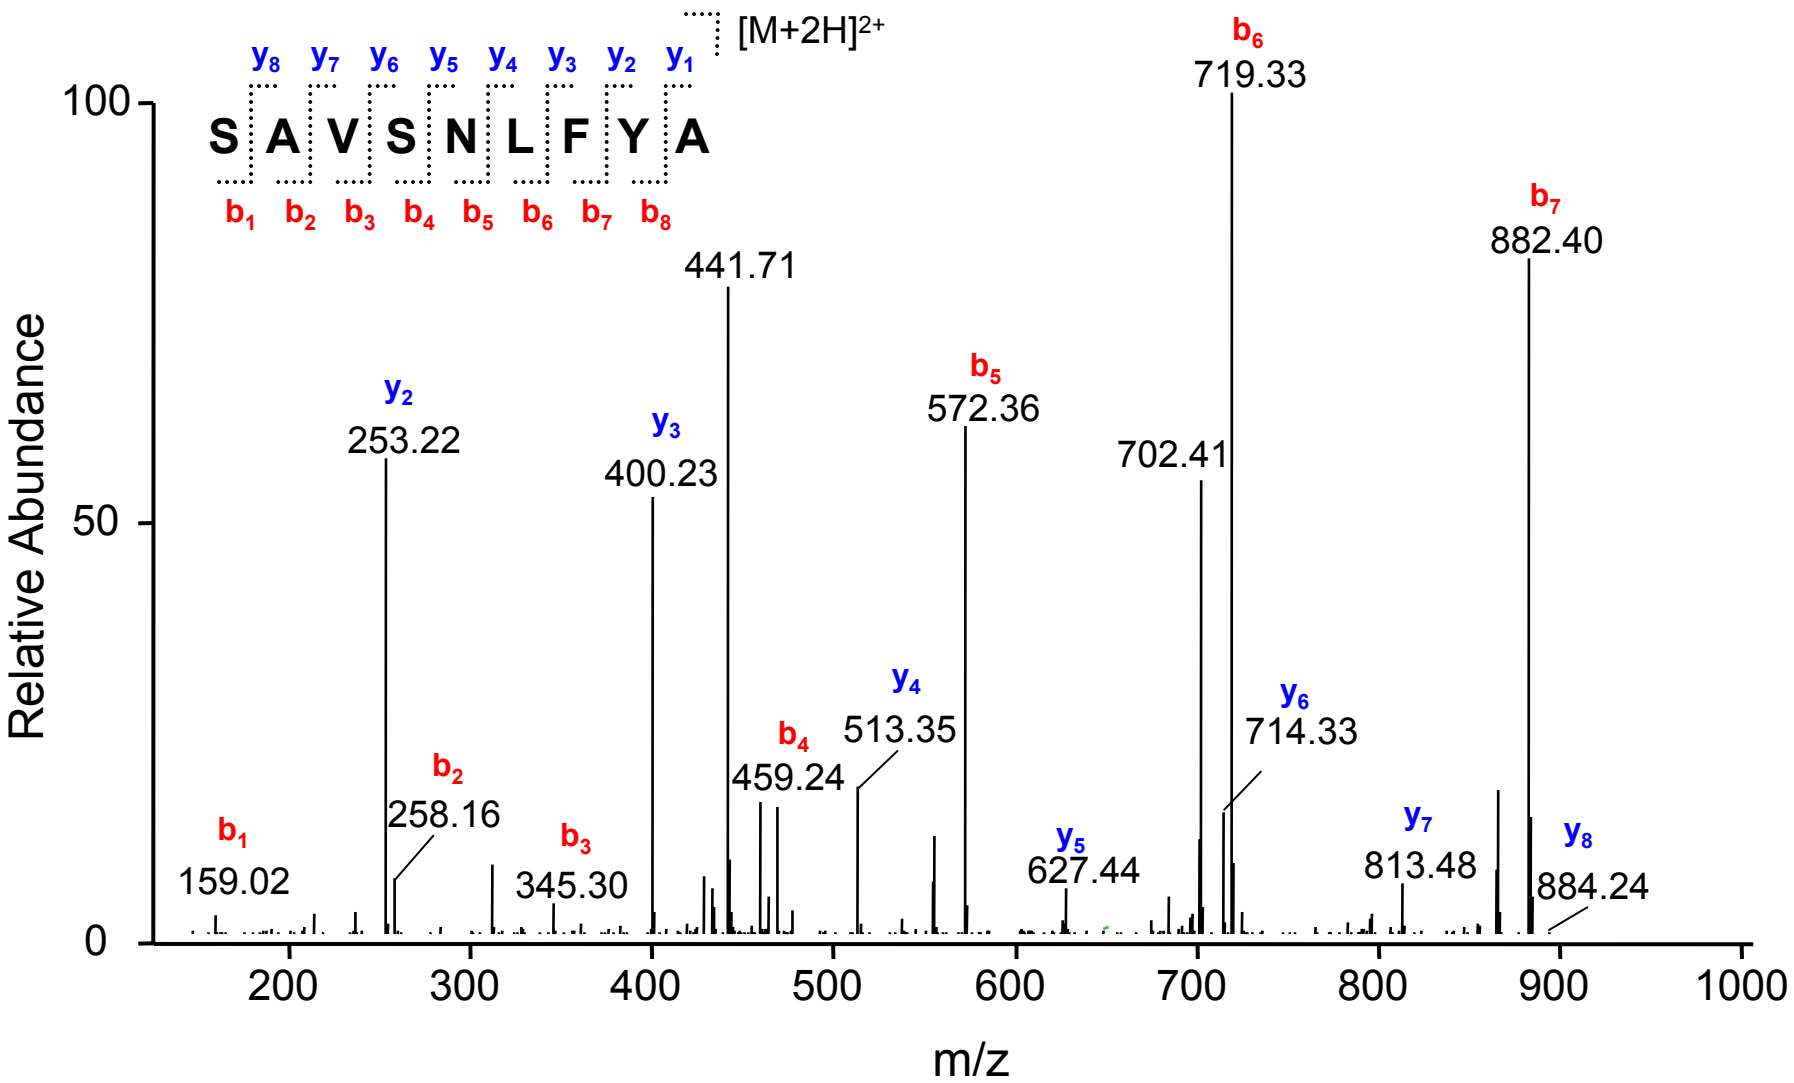

Supplement: pnas_0711504105_9.pdf [file pnas_0711504105_9.pdf]
